# Supplementary material for: Alpha-Tocopherol prevents esophageal squamous cell carcinoma by modulating PPARγ-Akt signaling pathway at the early stage of carcinogenesis
Source: PubMed Central journal article supplement (PMC5707070; doi:10.18632/oncotarget.21437), 2017-09-30
Supplement: oncotarget-08-95914-s001.pdf [file oncotarget-08-95914-s001.pdf]

## Alpha-Tocopherol prevents esophageal squamous cell carcinoma by modulating PPAR $\gamma$ -Akt signaling pathway at the early stage of carcinogenesis

### SUPPLEMENTARY MATERIALS

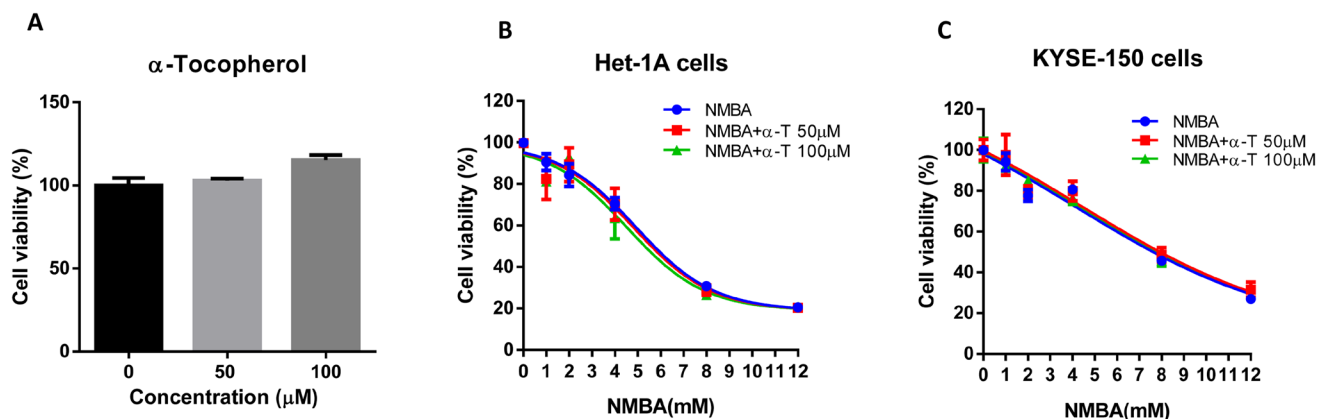

**Supplementary Figure 1: α-Tocopherol is not a competitive inhibitor for NMBA activity in esophageal cells.** (A) α-Tocopherol did not induce cytotoxicity in Het-1A cells. (B) α-Tocopherol (50 and 100 μM) did not affect the toxicity of NMBA in Het-1A cells. (C) α-Tocopherol did not affect the toxicity of NMBA in KYSE-150 cells. Cells were treated with NMBA in the absence or presence of α-Tocopherol for 24 h, cell viability was determined with Cell counting kit (CCK-8).

**Supplementary Table 1: Pathway enrichment and identified genes**

| <b>Pathways</b>                                               | <b>Genes</b>                                                              |
|---------------------------------------------------------------|---------------------------------------------------------------------------|
| <i>PI3K-Akt signaling pathway</i>                             | AKT3, CCNE2, CHUK, FN1, IL7, IL7R, ITGA4, ITGAV, ITGB6, LAMC2, TNC, VEGFC |
| <i>Pathways in cancer</i>                                     | AKT3, BIRC3, CCNE2, CHUK, FN1, FZD3, IL8, ITGAV, LAMC2, TGFBR1, VEGFC     |
| <i>Cytokine-cytokine receptor interaction</i>                 | CCL2, IL23A, IL6ST, IL7, IL7R, IL8, INHBA, TGFBR1, TNFSF18, VEGFC         |
| <i>Focal adhesion</i>                                         | AKT3, BIRC3, FN1, ITGA4, ITGAV, ITGB6, LAMC2, TNC, VEGFC                  |
| <i>Small cell lung cancer</i>                                 | AKT3, BIRC3, CCNE2, CHUK, FN1, ITGAV, LAMC2                               |
| <i>ECM-receptor interaction</i>                               | CD44, FN1, ITGA4, ITGAV, ITGB6, LAMC2, TNC                                |
| <i>Chagas diseases</i>                                        | AKT3, C3, CCL2, CHUK, IL8, TGFBR1, TLR6                                   |
| <i>NOD-like receptor signaling pathway</i>                    | BIRC3, CCL2, CHUK, IL8, TNFAIP3                                           |
| <i>Arrhythmogenic right ventricular cardiomyopathy (ARVC)</i> | CDH2, ITGA4, ITGAV, ITGB6, RYR2                                           |
| <i>Taste transduction</i>                                     | PRKACB, TAS2R14, TAS2R30, TAS2R31                                         |
